# Supplementary material for: Preparation of simple and mixed nickel and cobalt molybdates using hybrid precursors made from an ordered polymer matrix and inorganic salts
Source: Royal Society of Chemistry journal article supplement (doi:10.1039/b410151k), 2004-01-01
Supplement: b410151k.pdf [file b410151k.pdf]

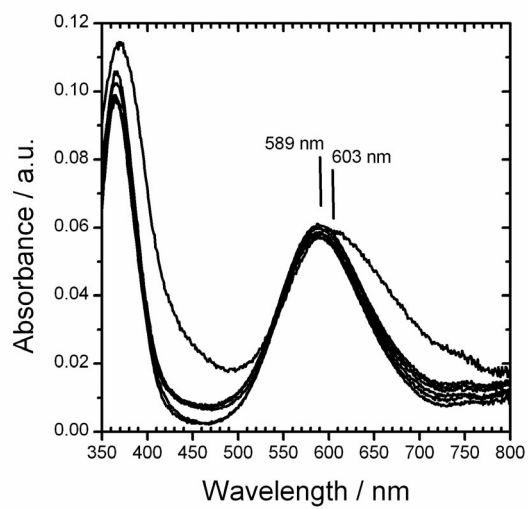

**Fig. S1** Electronic spectrum of a solution of Ni<sup>2+</sup> in trifluoroethanol ( $\lambda_{\text{max}} = 603$  nm), compared with the spectra of solutions of Ni<sup>2+</sup> together with different amounts of copolymer (0.5, 1, 1.5, 2, 3, 4 mol of repeat unit per mol of Ni<sup>2+</sup> metal cation) ( $\lambda_{\text{max}} = 589$  nm).

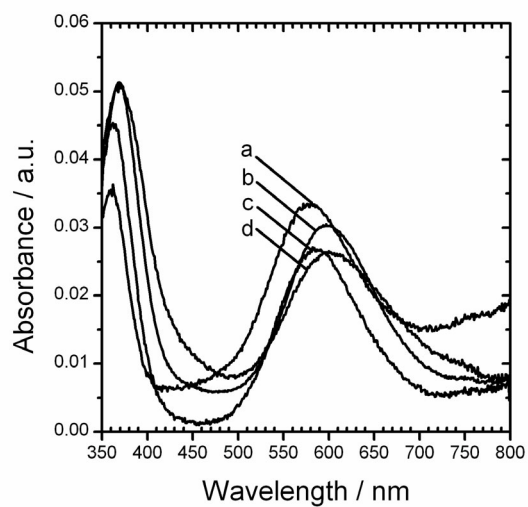

**Fig. S2** Electronic spectra of Ni(II) aqueous solutions, together with different hypothetical ligands: (a) N-methylpyrrolidine, (b) ammonia only (reference spectrum), (c) the polymer, and (d) succinic acid (pH adjustment to 11.0 with 0.1 M aqueous ammonia).
